# Supplementary material for: A Review on Antistaphylococcal Secondary Metabolites from Basidiomycetes
Source: MDPI journal article supplement (doi:10.3390/molecules25245848), 2020-12-11
Supplement: s1 [file s1]

**Supplementary Material 2.0**

**Figure 1: Structures of antimicrobial compounds isolated from Basidiomycetes.**

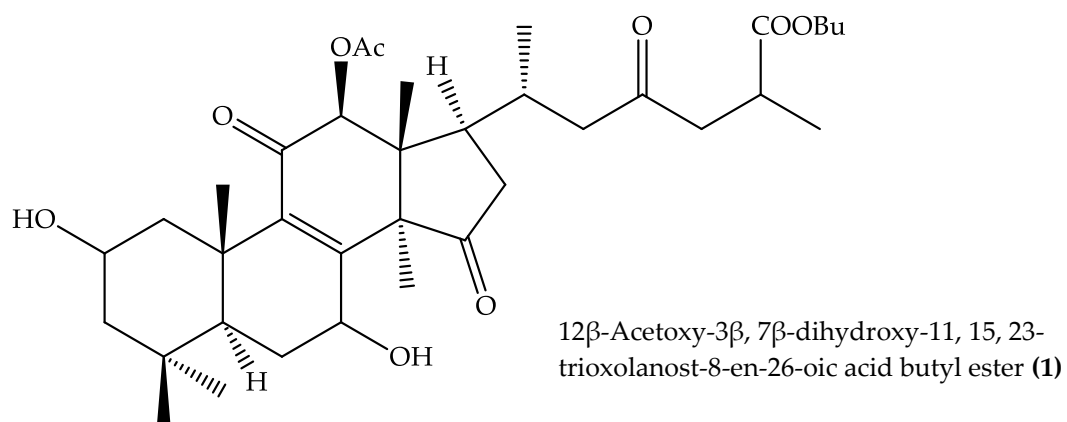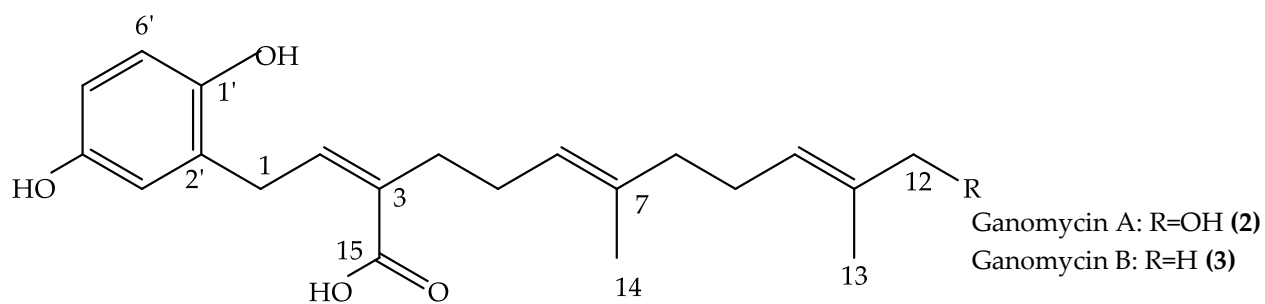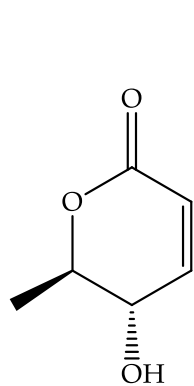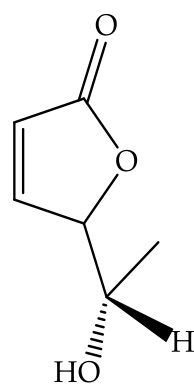

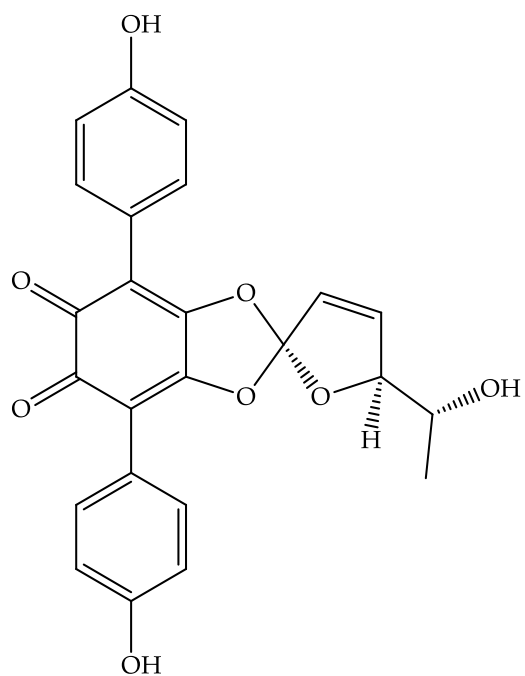

Spiromentin C (6)

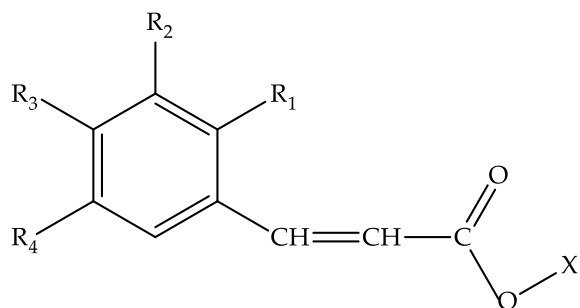

*p*-Coumaric acid: X=CHCHCOOH; R<sub>1</sub>=H; R<sub>2</sub>=H; R<sub>3</sub>=OH; R<sub>4</sub>=H (8)

Cinnamic acid: X=CHCHCOOH; R<sub>1</sub>=H; R<sub>2</sub>=H; R<sub>3</sub>=H; R<sub>4</sub>=H (9)

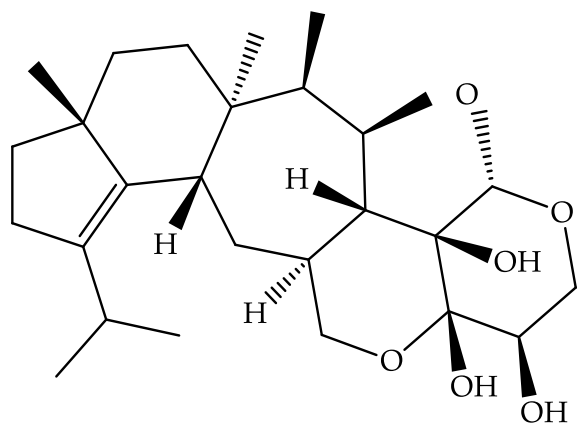

Laxitextine A (10)

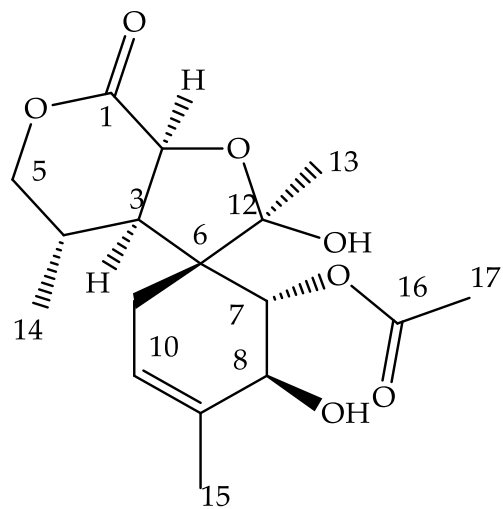

8-Deacetylcyclocalopin B (11)

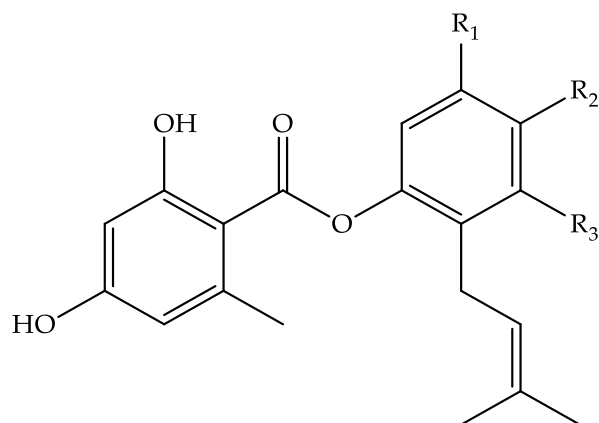

Benzoate derivative 1:  $R_1=H$ ;  $R_2=OH$ ;  $R_3=OCH_3$  (**12**)

Benzoate derivative 2:  $R_1=H$ ;  $R_2=OH$ ;  $R_3=H$  (**13**)

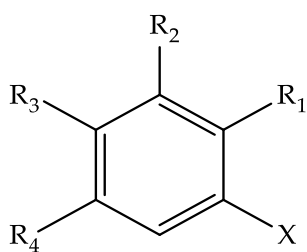

*p*-Hydroxybenzoic acid:  $X=COOH$ ;  $R_1=H$ ;  $R_2=H$ ;  $R_3=OH$ ;  $R_4=H$  (**7**)

2,4-Dihydroxybenzoic acid:  $X=COOH$ ;  $R_1=OH$ ;  $R_2=H$ ;  $R_3=OH$ ;  $R_4=H$  (**14**)

Protocatechuic acid:  $X=COOH$ ;  $R_1=H$ ;  $R_2=H$ ;  $R_3=OH$ ;  $R_4=OH$  (**15**)

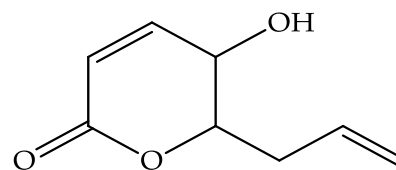

6-allyl-5,6-dihydro-5-hydroxypyran-2-one (**16**)

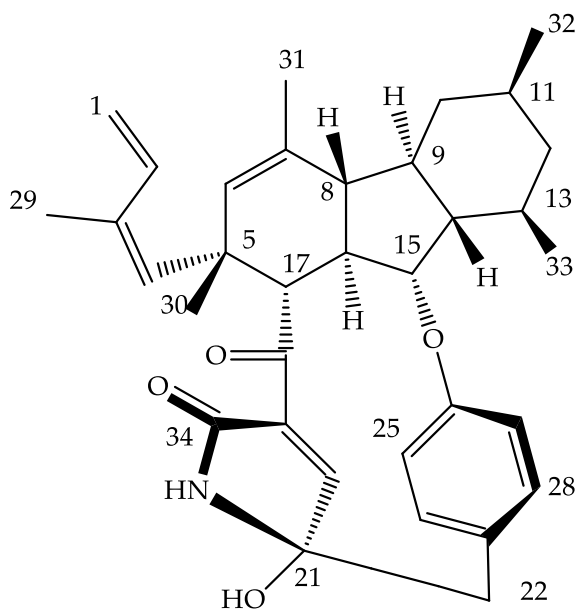

Pyrrocidine C (**17**)

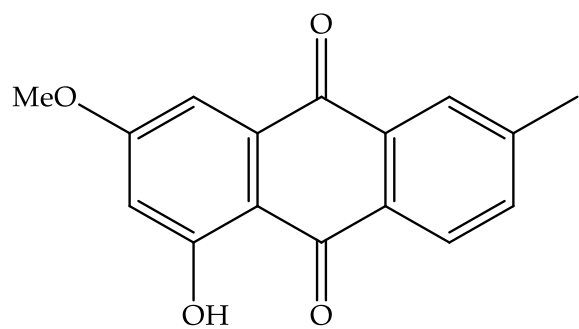

6-methylxanthopurpurin-3-O-methyl ether (**18**)

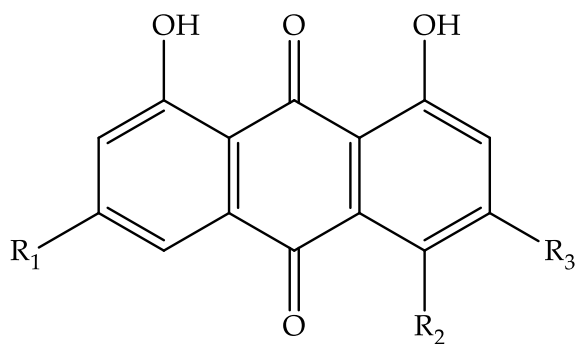

Physcion: R<sub>1</sub>=Me; R<sub>2</sub>=H; R<sub>3</sub>=OMe (**19**)

Emodin: R<sub>1</sub>=Me; R<sub>2</sub>=H; R<sub>3</sub>=OMe (**24**)

Erythroglaucon: R<sub>1</sub>=Me; R<sub>2</sub>=H; R<sub>3</sub>=OMe (**25**)

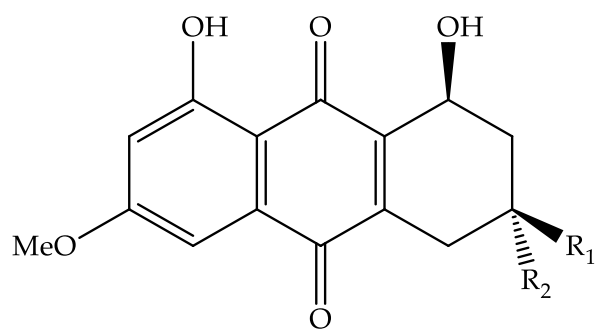

(1S,3S) Austrocortilutein: R<sub>1</sub>=OH; R<sub>2</sub>=Me (**20**)

(1S,3R) Austrocortilutein: R<sub>1</sub>=Me; R<sub>2</sub>=OH (**21**)

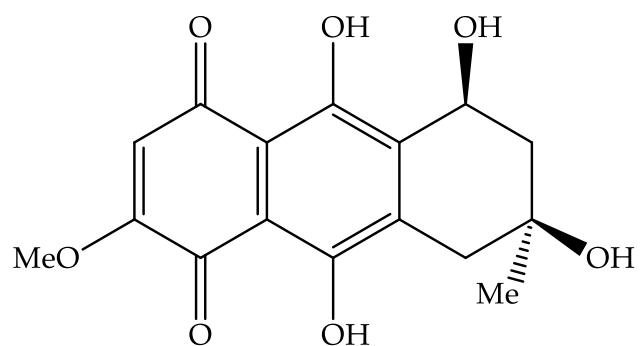

Austrocortirubin (**22**)

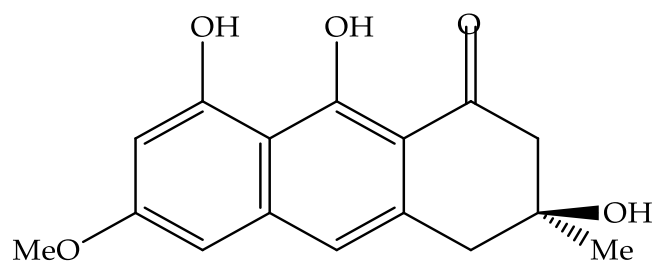

Torosachrysone (**23**)

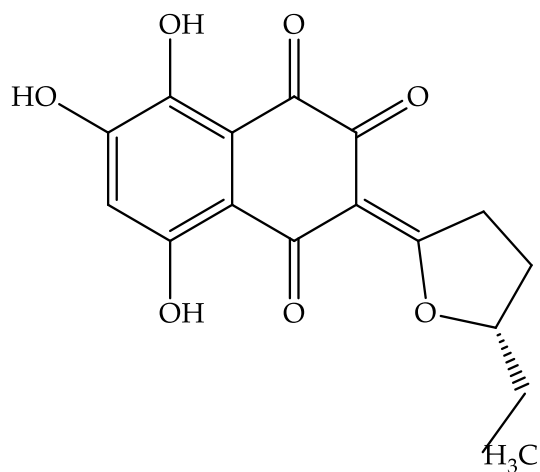

Quambalarine A (26)

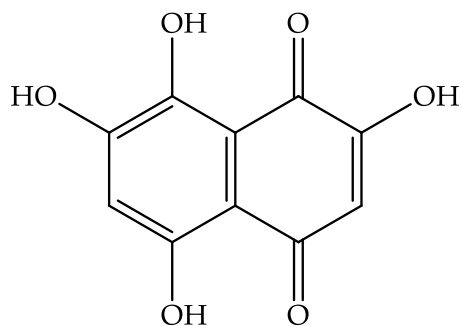

Mompain (27)

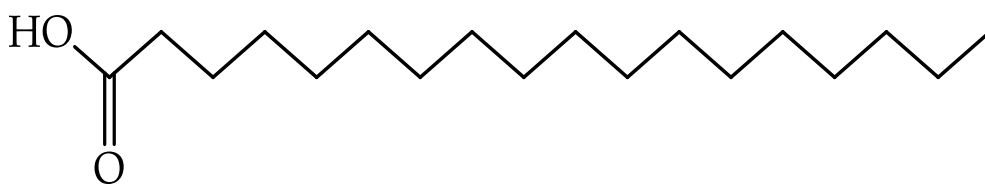

Stearic acid (28)

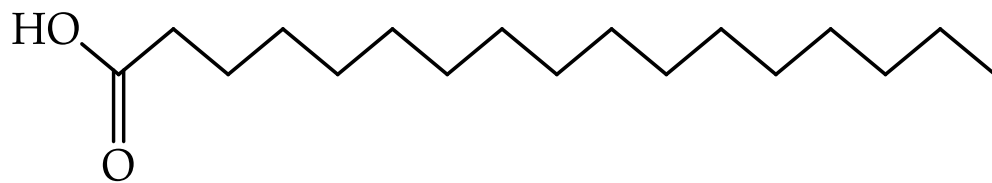

Heptadecanoic acid (29)

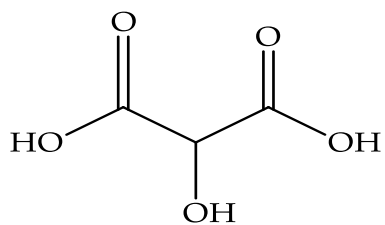

Tartronic acid (30)
